# Supplementary material for: Insights into the Phytochemistry of the Cuban Endemic Medicinal Plant Phyllanthus orbicularis: Fideloside, a Novel Bioactive 8-C-glycosyl 2,3-Dihydroflavonol
Source: Molecules. 2019 Aug 6;24(15):2855. doi: 10.3390/molecules24152855 (PMC6695706; doi:10.3390/molecules24152855)
Supplement: Supplementary file 1 [file molecules-24-02855-s001.pdf]

## Supplementary Materials:

# Insights into the phytochemistry of the Cuban endemic medicinal plant *Phyllanthus orbicularis*: Fideloside, a novel bioactive 8-C-glycosyl 2,3-dihydroflavonol

Antonio Francioso<sup>1,2,3\*</sup>, Katrin Franke<sup>1</sup>, Claudio Villani<sup>4</sup>, Luciana Mosca<sup>2</sup>, MariaD'Erme<sup>2</sup>, Stefan Frischbutter<sup>5,6</sup>, Wolfgang Brandt<sup>1</sup>, Angel Sanchez-Lamar<sup>3</sup> and LudgerWessjohann<sup>1,\*</sup>

<sup>1</sup> Department of Bioorganic Chemistry, Leibniz Institute of Plant Biochemistry, Halle (Saale), Germany;

<sup>2</sup> Department of Biochemical Sciences "A. Rossi Fanelli", Sapienza University of Rome, Roma, Italy;

<sup>3</sup> Department of Plant Biology, Faculty of Biology, University of Havana, La Habana, Cuba

<sup>4</sup> Department of Chemistry and Technology of Drugs, Sapienza University of Rome, Roma, Italy;

<sup>5</sup> Department of Dermatology and Allergy, Charité, Universitätsmedizin Berlin, Berlin, Germany

<sup>6</sup> German Rheumatism Research Centre, a Leibniz Institute, Berlin, Germany

| Content:                                                                                                 | Page: |
|----------------------------------------------------------------------------------------------------------|-------|
| <b>Figure S1:</b> Chemical structure of natural products extracted from <i>Phyllanthus</i> species       | 2     |
| <b>Figure S2.</b> <sup>1</sup> H NMR spectrum of compound <b>3</b> (DMSOd6, 400 MHz)                     | 3     |
| <b>Figure S3.</b> <sup>13</sup> C NMR spectrum of compound <b>3</b> (DMSOd6, 400 MHz)                    | 3     |
| <b>Figure S4.</b> COSY spectrum of compound <b>3</b> (DMSOd6, 400 MHz)                                   | 4     |
| <b>Figure S5.</b> HSQC spectrum of compound <b>3</b> (DMSOd6, 400 MHz)                                   | 5     |
| <b>Figure S6.</b> HMBC spectrum of compound <b>3</b> (DMSOd6, 400 MHz)                                   | 6     |
| <b>Figure S7.</b> NOESY spectrum of compound <b>3</b> (DMSOd6, 400 MHz)                                  | 7     |
| <b>Figure S8:</b> ATR infrared spectrum of compound <b>3</b>                                             | 8     |
| <b>Figure S9:</b> Moststable conformation of the 2 <i>S</i> ,3 <i>S</i> enantiomer for compound <b>3</b> | 9     |
| <b>Table S1:</b> DFT calculations for the 2 <i>S</i> ,3 <i>S</i> enantiomer (compound <b>3</b> )         | 9     |

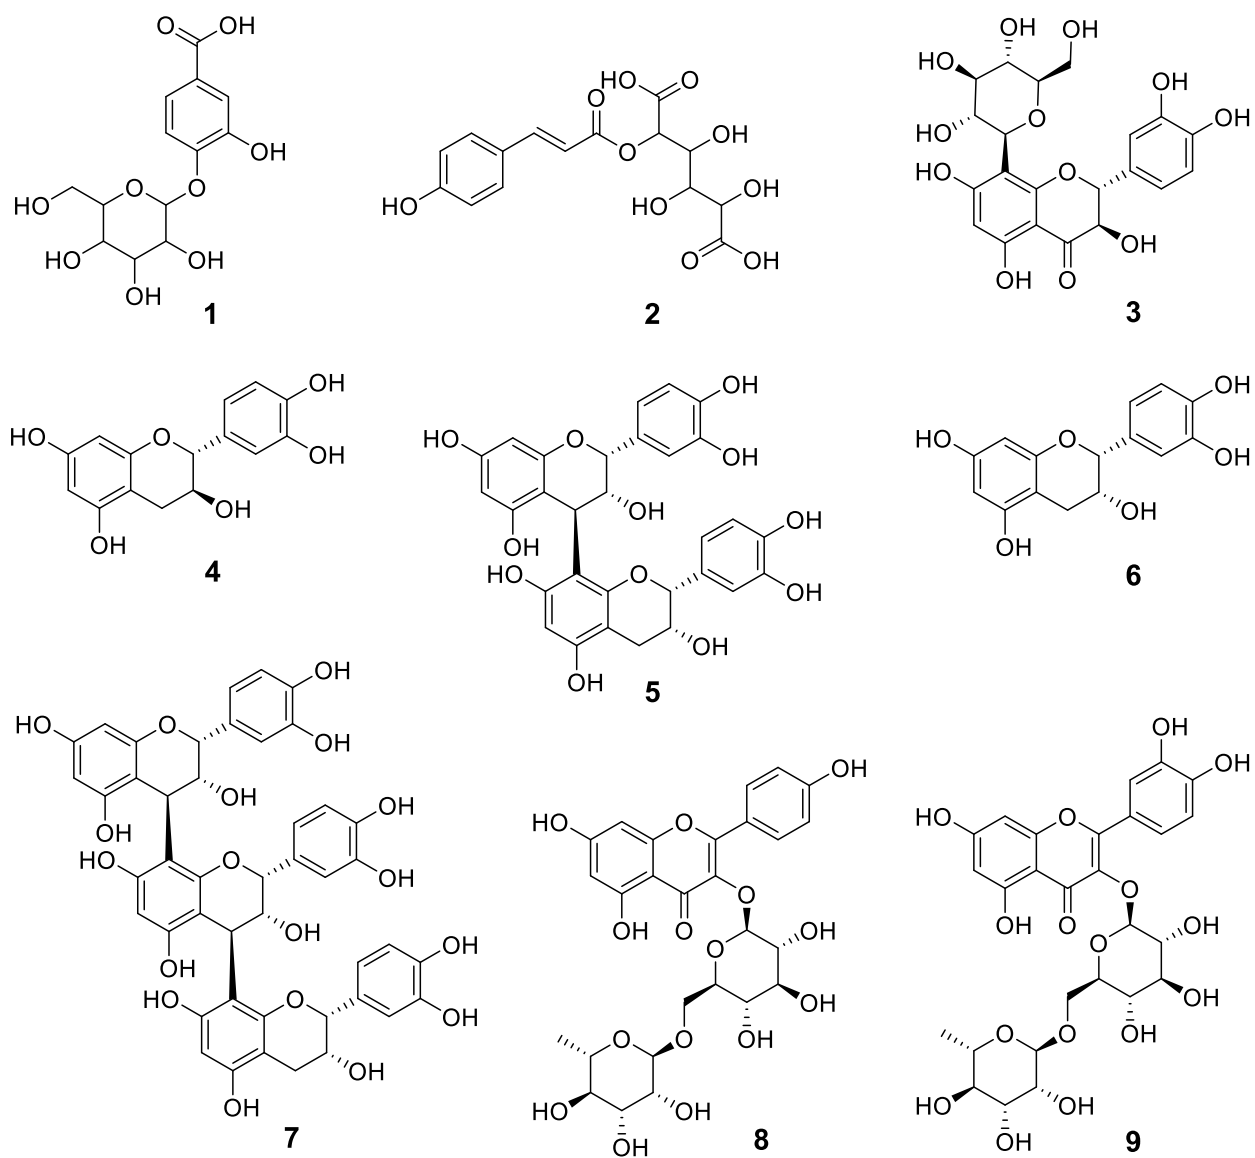

**Figure S1:**Chemical structure of natural products extracted from *Phyllanthus* species

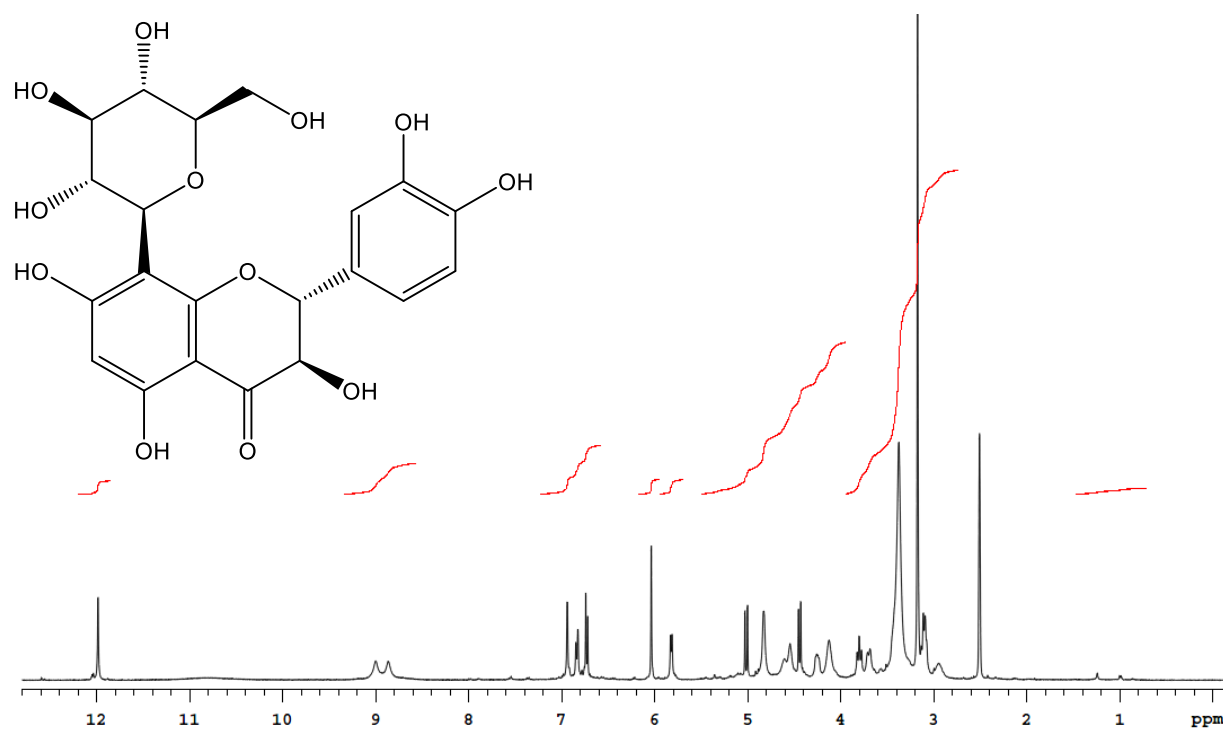

**Figure S2.**  $^1\text{H}$  NMR spectrum of compound **3** (DMSO- $d_6$ , 400 MHz)

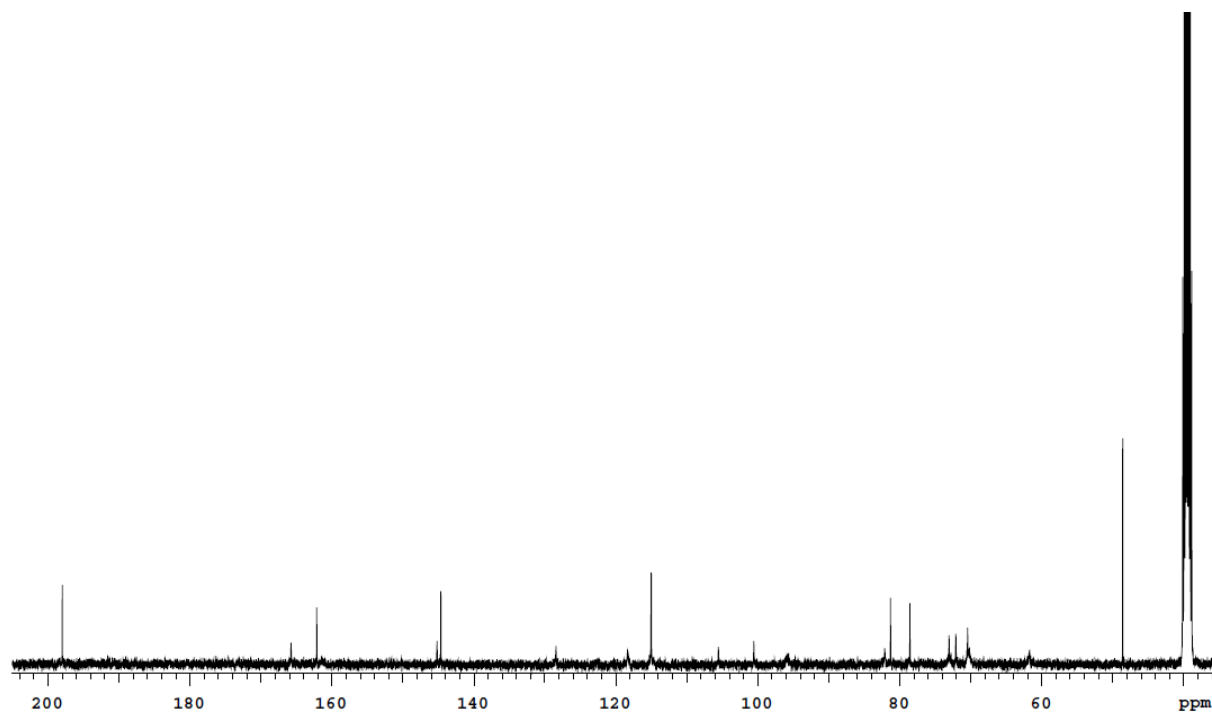

**Figure S3.**  $^{13}\text{C}$  NMR spectrum of compound **3** (DMSO- $d_6$ , 400 MHz)

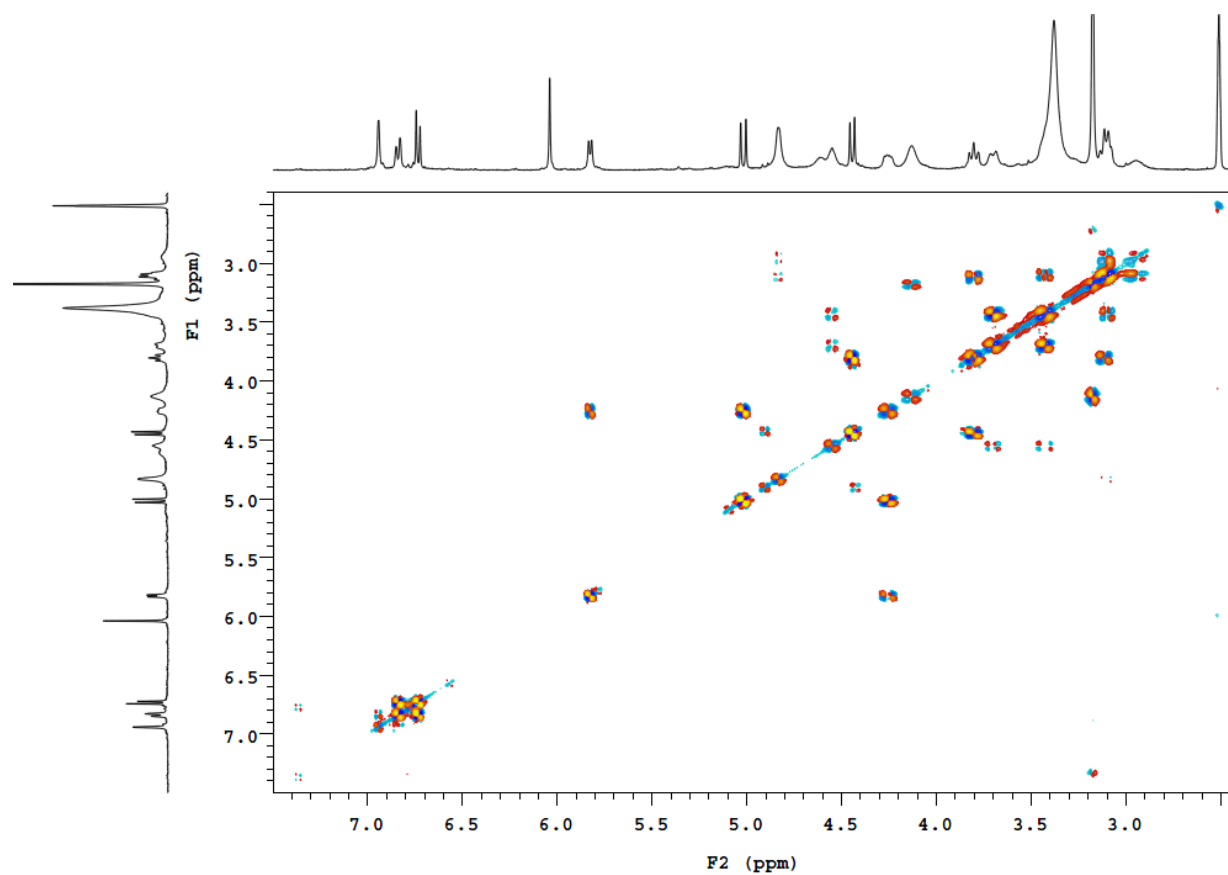

**Figure S4.** COSY spectrum of compound **3**(DMSO-d<sub>6</sub>, 400 MHz)

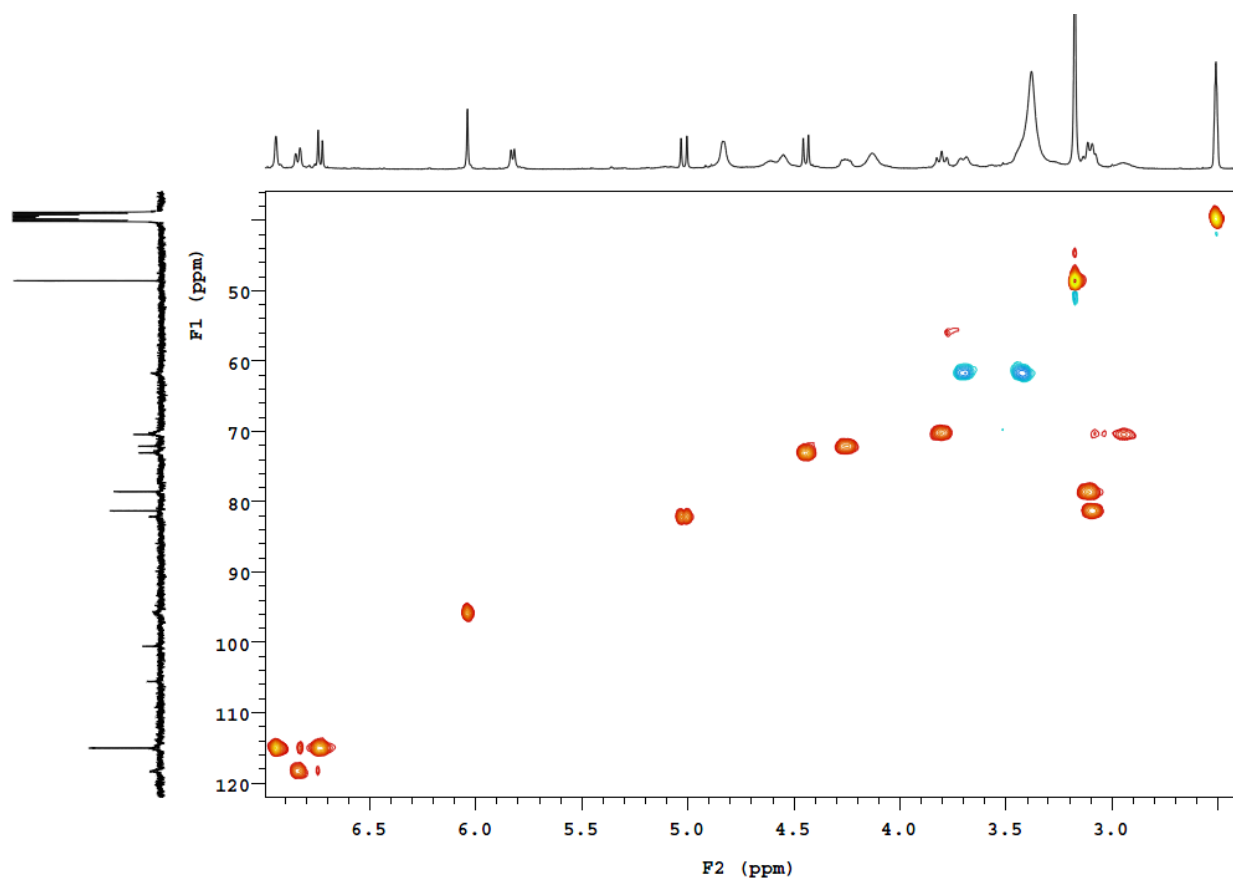

**Figure S5.** HSQC spectrum of compound **3**(DMSO-d<sub>6</sub>, 400 MHz)

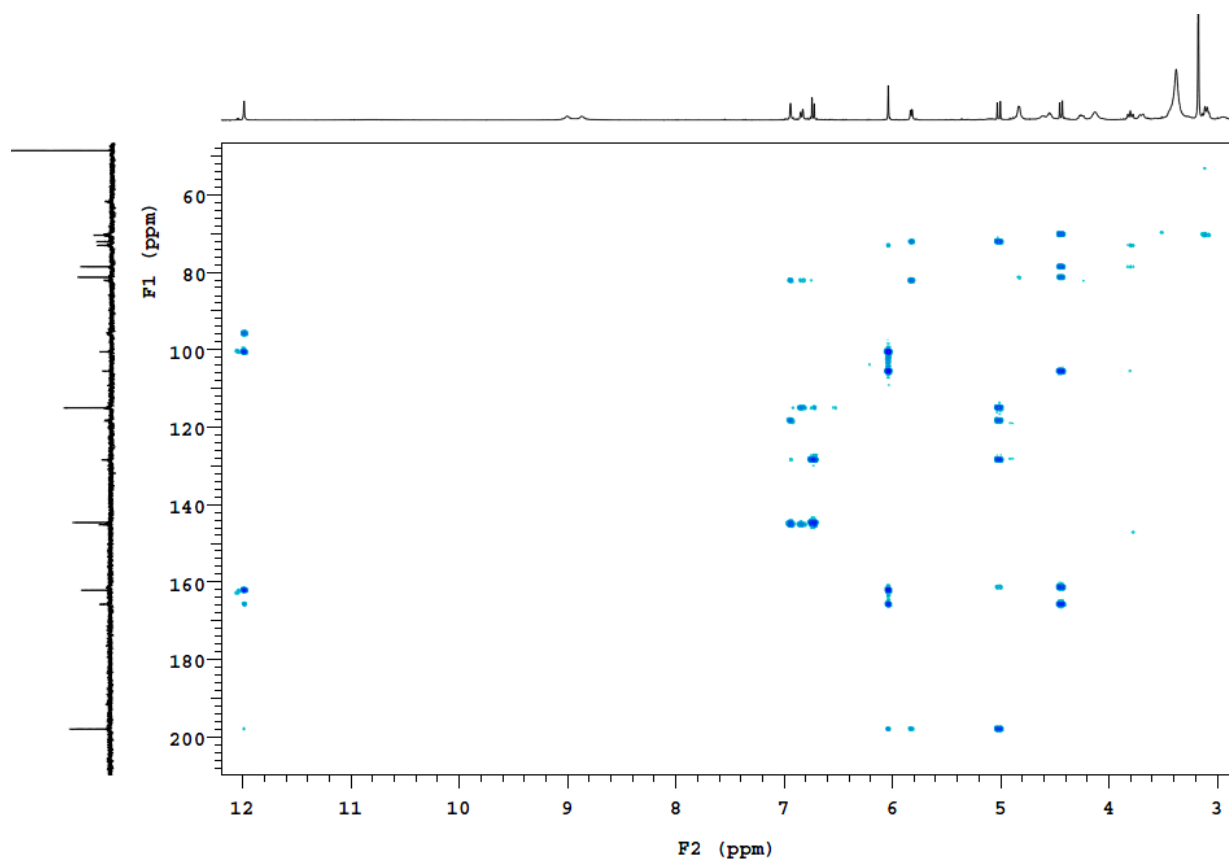

**Figure S6.** HMBC spectrum of compound **3** (DMSO-d<sub>6</sub>, 400 MHz)

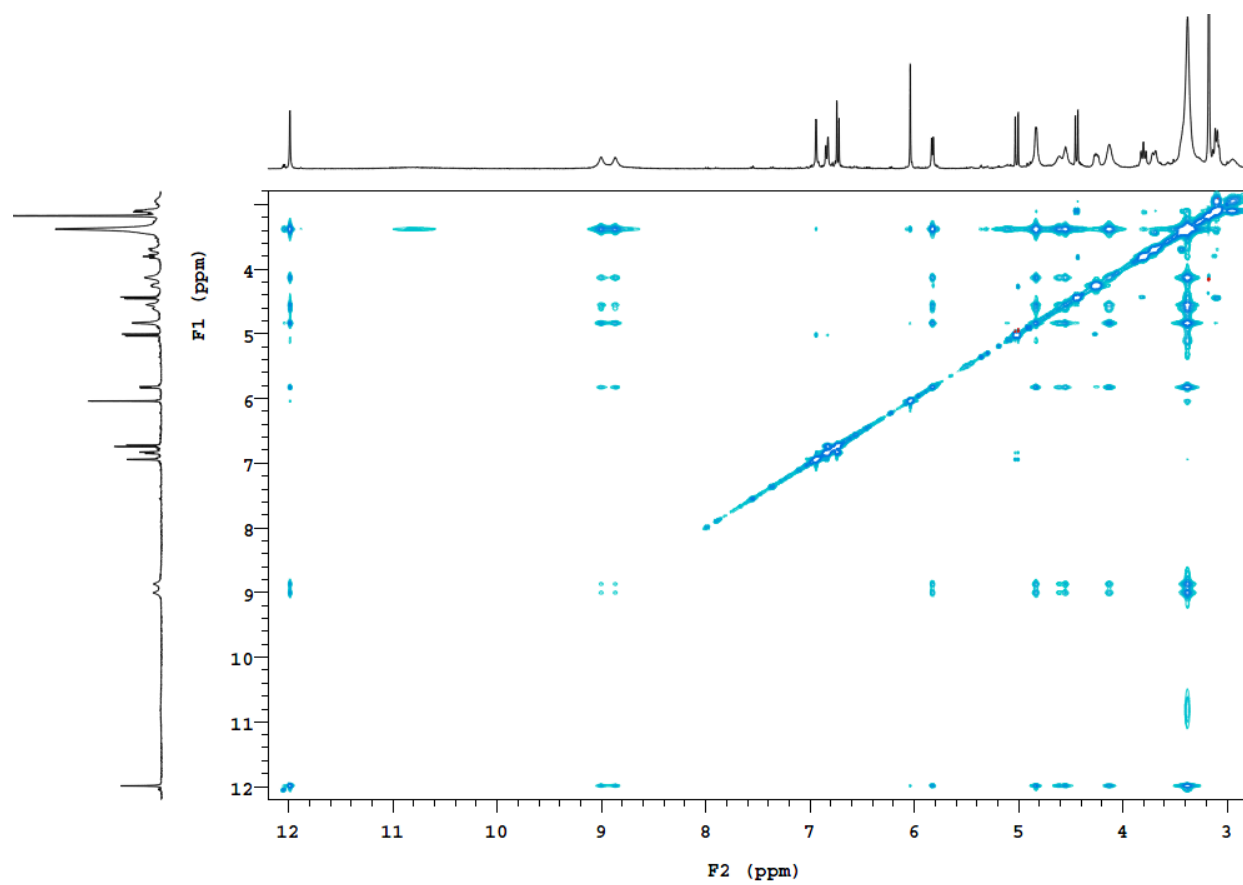

**Figure S7.** NOESY spectrum of compound **3** (DMSO-d<sub>6</sub>, 400 MHz)

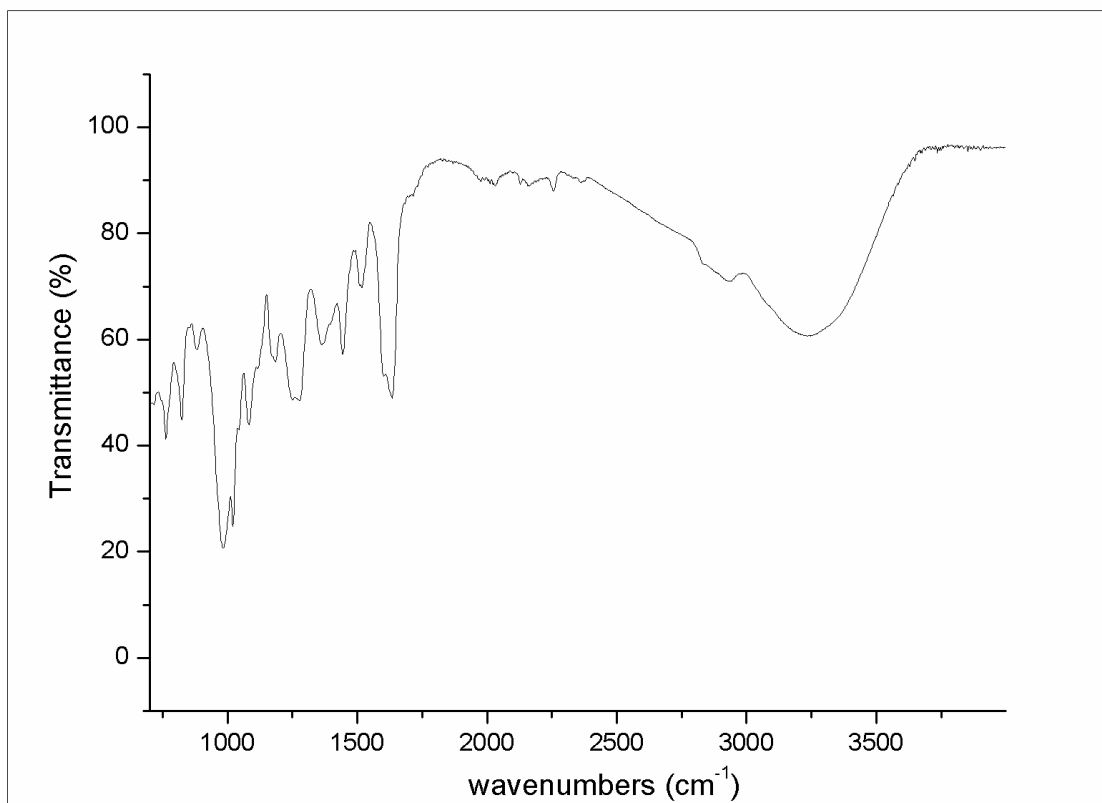

**Figure S8:**ATR infrared spectrum of compound **3**

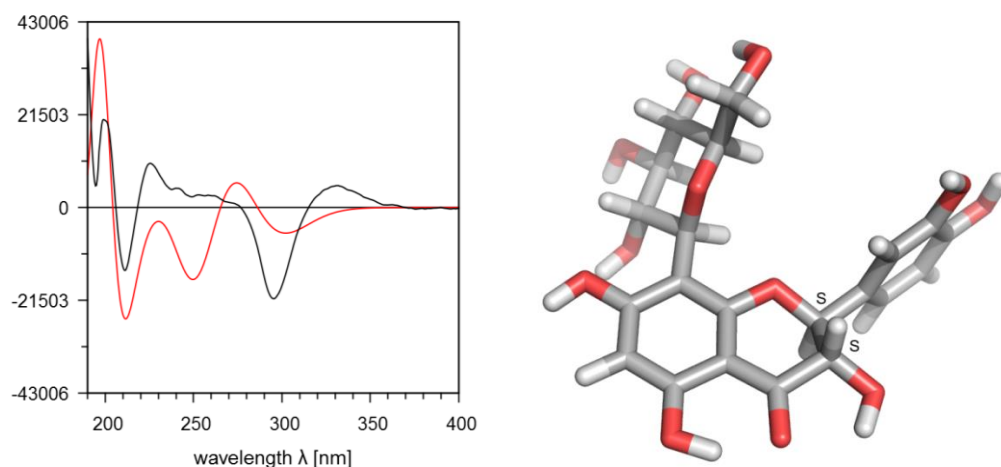

**Figure S9.** Comparison of experimental CD spectrum (black line) with Boltzmann weighted calculated CD spectrum (see Table S1) for the 2*S*,3*S* enantiomer with a similarityfactor  $S = 0.5276$  for sigma =0.3 eV and -2 nm shift. right: Calculated moststable conformation of the 2*S*,3*S* enantiomer.

**Table S1:** Results of DFT calculations for the 2*S*, 3*S* enantiomer

| Conformation | O-C2-C1'-C2'<br>(in °) | C2'-C3'-O-H<br>(in°) | Energy<br>(kcal/mol) | Boltzmann<br>weight | CD-fit |
|--------------|------------------------|----------------------|----------------------|---------------------|--------|
| 1            | 67.1                   | 2.9                  | 0.00                 | 31.0                | 0.6105 |
| 2            | 64.7                   | -179.5               | 0.04                 | 29.0                | 0.5841 |
| 3            | -113.7                 | 179.5                | 0.14                 | 24.5                | 0.4789 |
| 4            | -113.1                 | 0.3                  | 0.41                 | 15.5                | 0.5555 |
| Boltzmann    |                        |                      |                      |                     | 0.5276 |
